# Supplementary material for: ABySS 2.0: resource-efficient assembly of large genomes using a Bloom filter
Source: HighWire-hosted journal article supplement (doi:10.1101/gr.214346.116), 2017-02-23

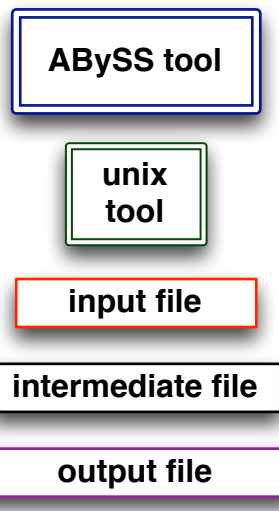

- Assemble the input files
- Find overlaps of [m,k] bases
- Filter out shim contigs
- Identify and pop simple bubbles
- Merge paths of contigs to create larger contigs.
- Align reads to contigs
- Find pairs of reads in alignments
- Estimate distances between contigs
- Merge distance estimates
- Find overlaps between blunt contigs
- Find paths through contigs using distance estimates
- Merge sequences of contigs IDs
- Find paths that overlap, assembling overlapping paths
- Align sequences of ambiguous paths and output a consensus
- Find paths that overlap, output graph
- Merge paths of contigs to create larger contigs
- Scaffold contigs using the distance estimate graph

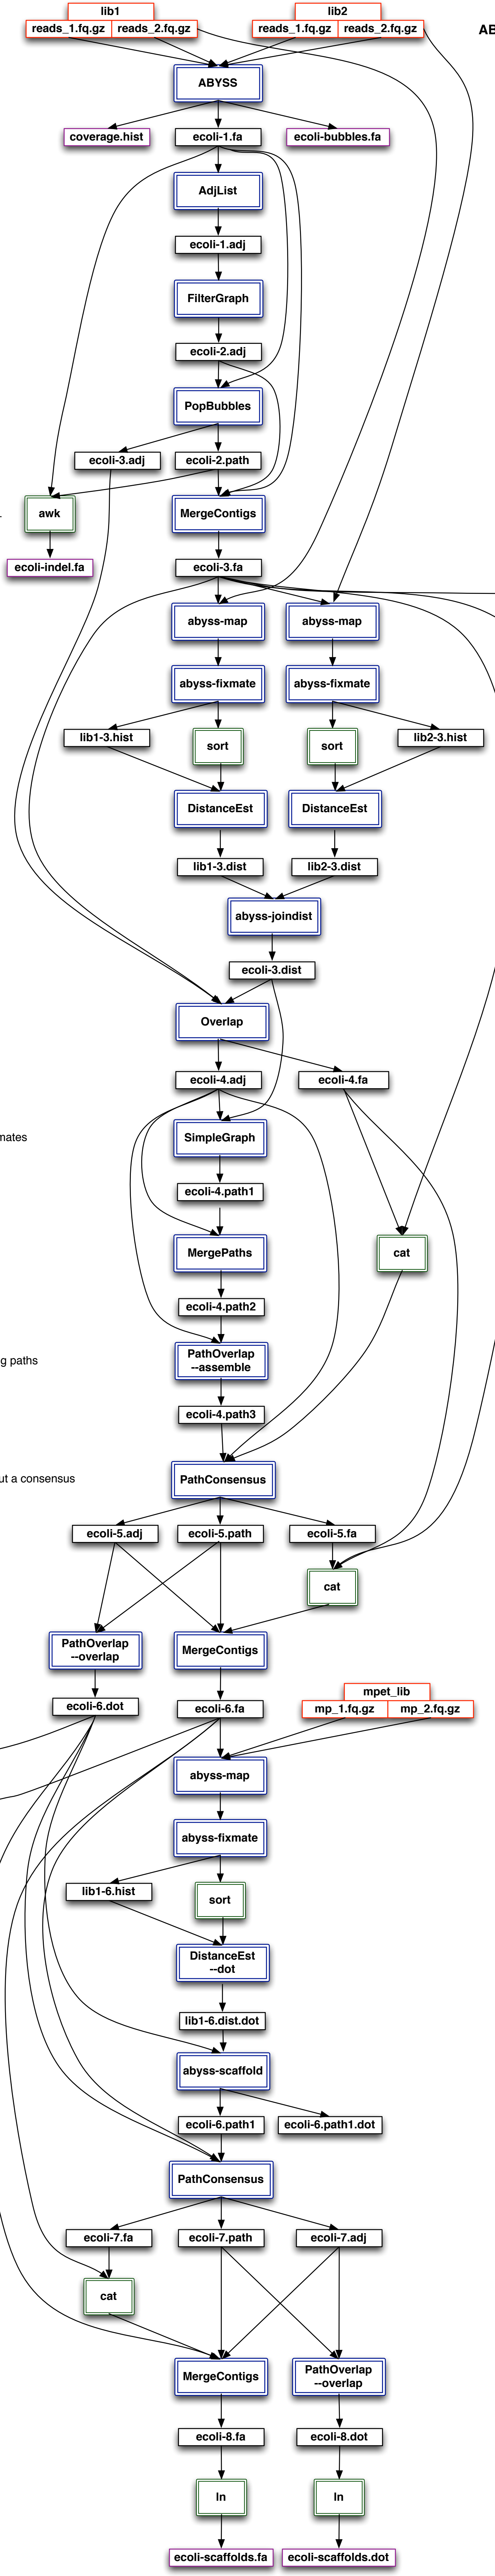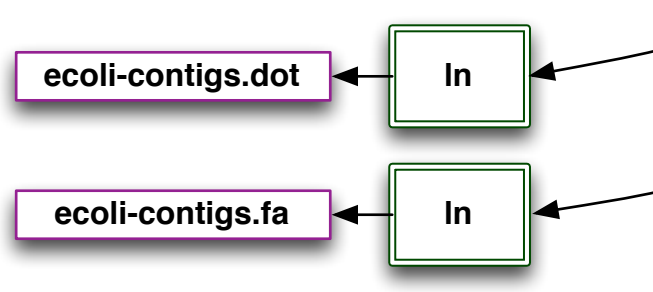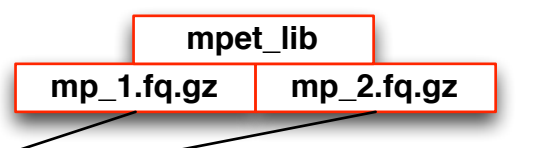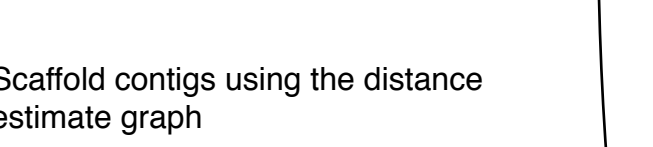

Supplement: Supplemental_Archive_1.tar.gz [file flowchart.pdf › abyss-bloom-abyss-preview/doc/flowchart.pdf]
