# Supplementary figures and images for: ABySS 2.0: resource-efficient assembly of large genomes using a Bloom filter
Source: HighWire-hosted journal article supplement (doi:10.1101/gr.214346.116), 2017-02-23

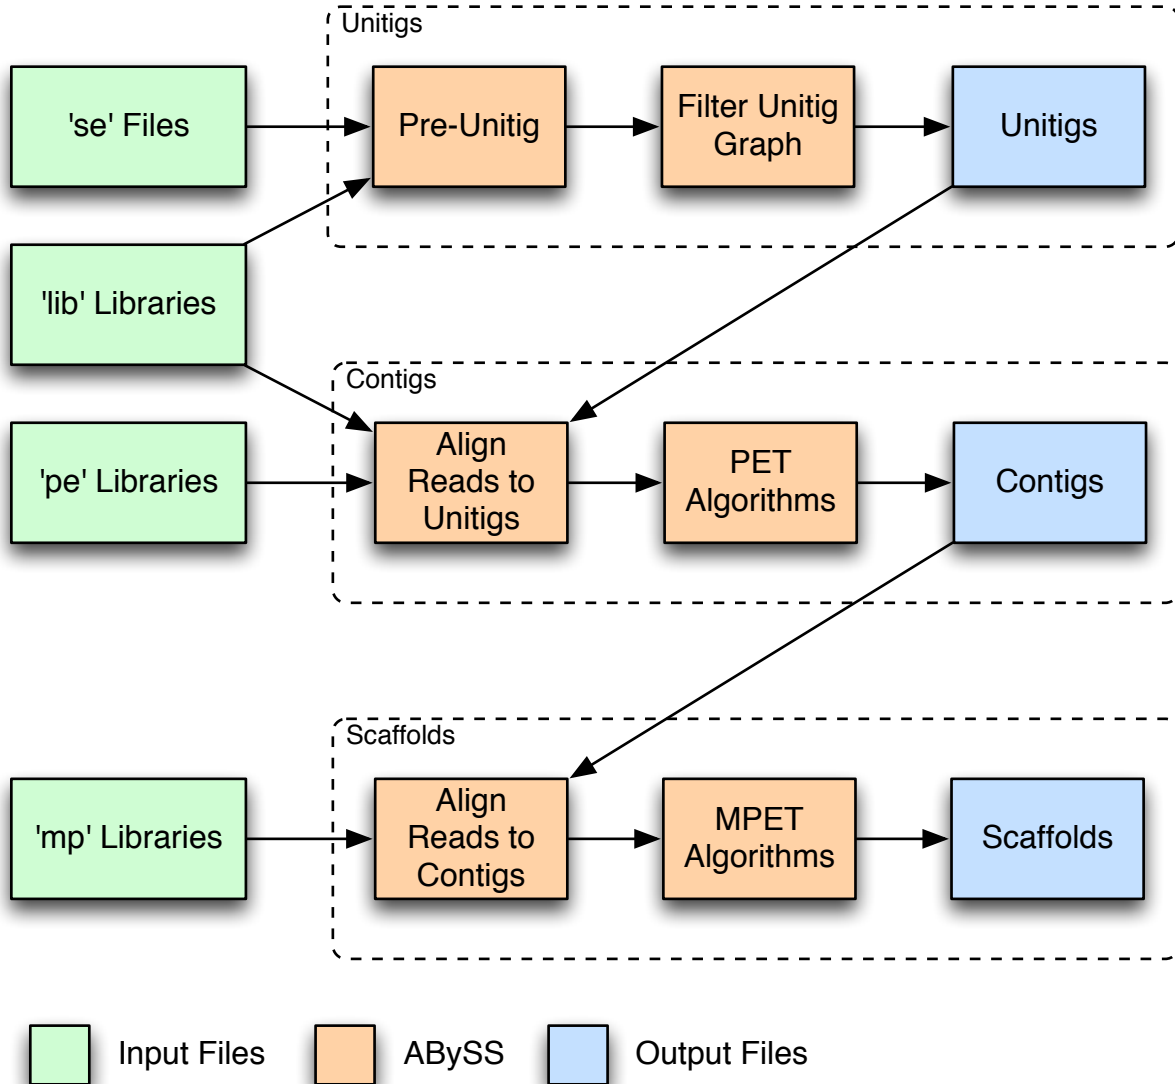

Supplement: Supplemental_Archive_1.tar.gz [file flowchart_simplified.pdf › abyss-bloom-abyss-preview/doc/flowchart_simplified.pdf]
